# Supplementary material
Source: MDPI journal article supplement (https://www.mdpi.com/2073-4441/13/11/1558)
Supplement: s1 [file s1]

# Improvement of Phosphate Adsorption Kinetics onto Ferric Hydroxide by Size Reduction

Vicenç Martí <sup>1,2,\*</sup>, Irene Jubany <sup>2</sup>, David Ribas <sup>2</sup>, José Antonio Benito <sup>3</sup>, and Berta Ferrer <sup>1</sup>

<sup>1</sup> Barcelona Research Center in Multiscale Science and Engineering (EEBE), Department of Chemical Engineering, Technical University of Catalonia (UPC), Av. Eduard Maristany 16, 08019 Barcelona, Spain; bferre-  
rorra@gmail.com

<sup>2</sup> Eurecat, Technology Centre of Catalonia, Water, Air and Soil Unit, Placa de la Ciència 2, 08242 Manresa, Spain; irene.jubany@eurecat.org (I.J.), davidrrff@gmail.com (D.R.)

<sup>3</sup> Department of Materials Science and Metallurgical (EEBE), Technical University of Catalonia (UPC), Av. Eduard Maristany 16, 08019 Barcelona, Spain; jose.a.benito@upc.edu

\* Correspondence: vicens.marti@upc.edu; Tel.: +34-93-401-0957

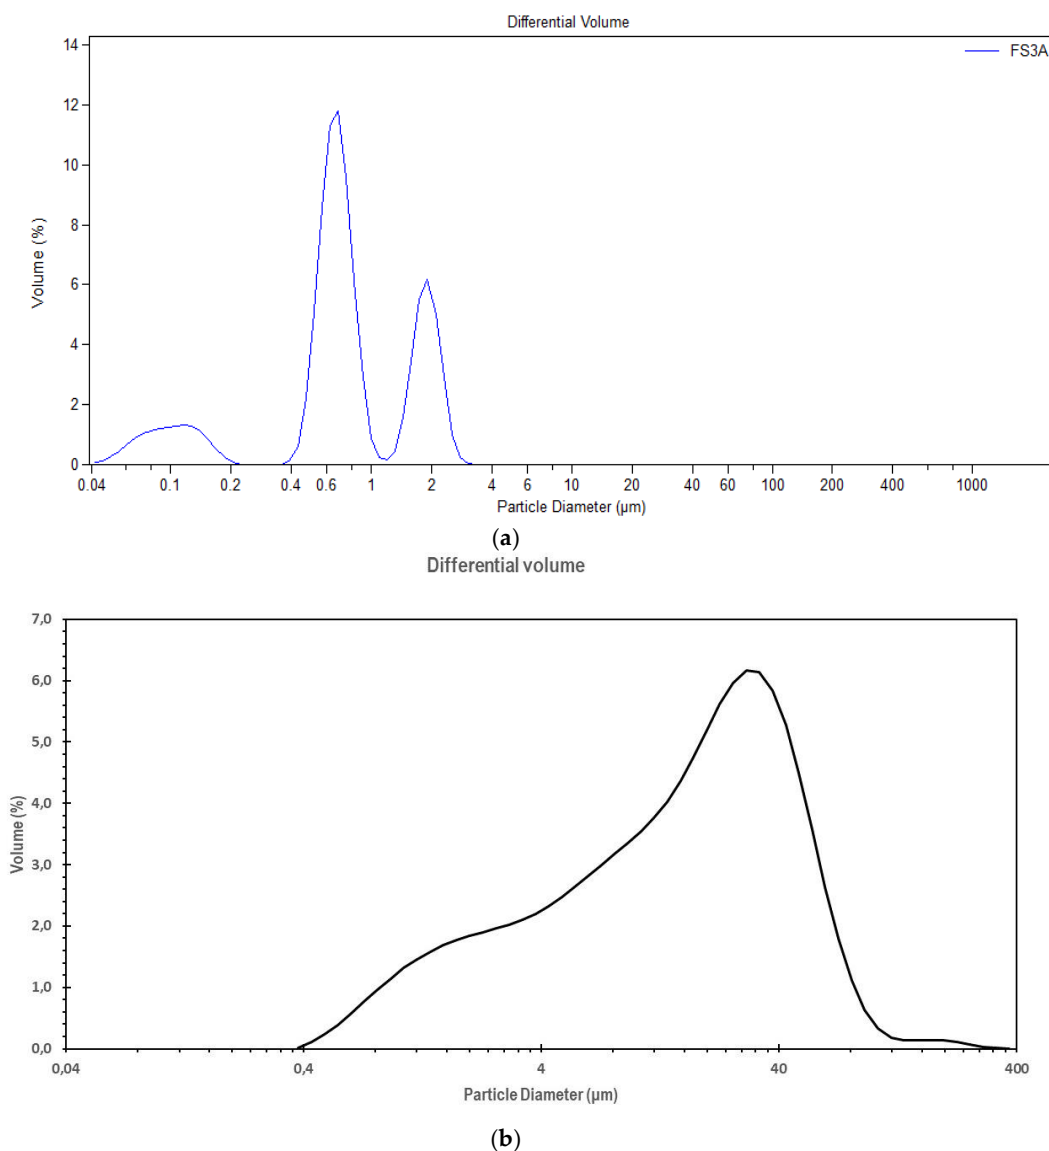

**Figure S1.** Size distribution (a) OF-M (milled), (b) OF-U (ultra-sonicated).

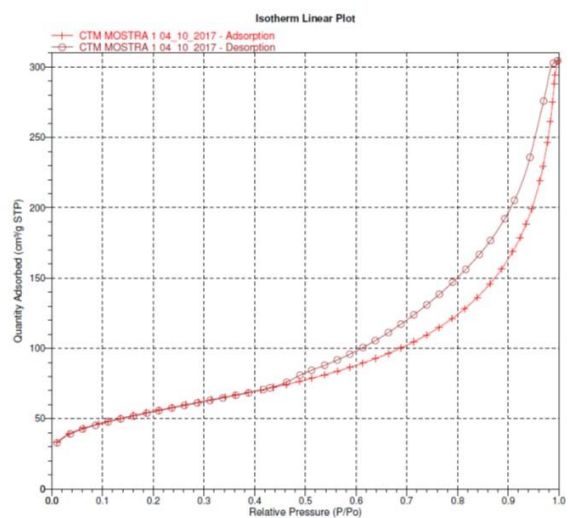

(a)

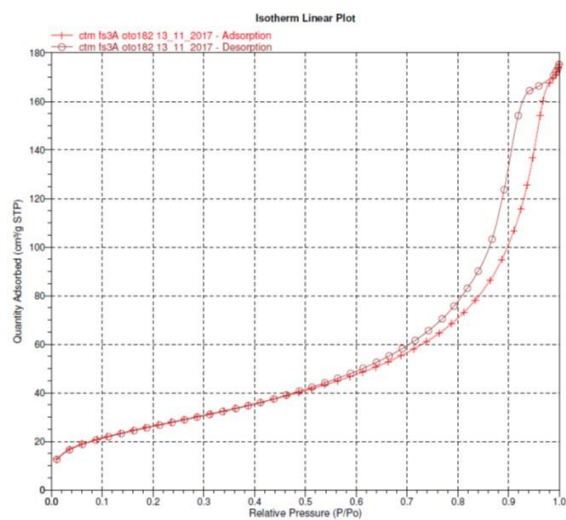

(b)

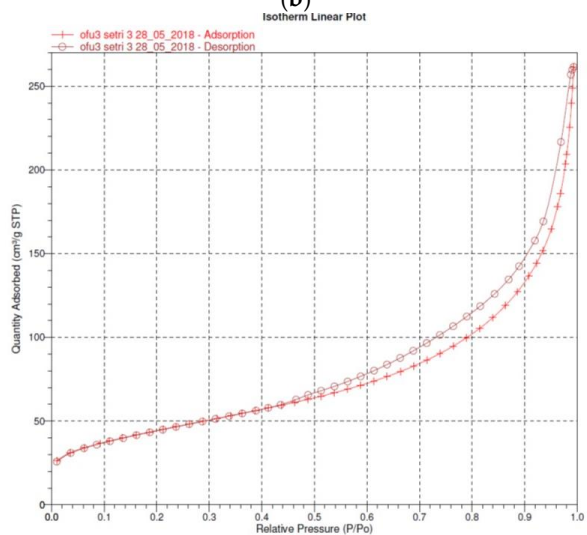

(c)

Figure S2. BET curves (a) GFH, (b) OF-M (milled), (c) OF-U (ultra-sonicated).

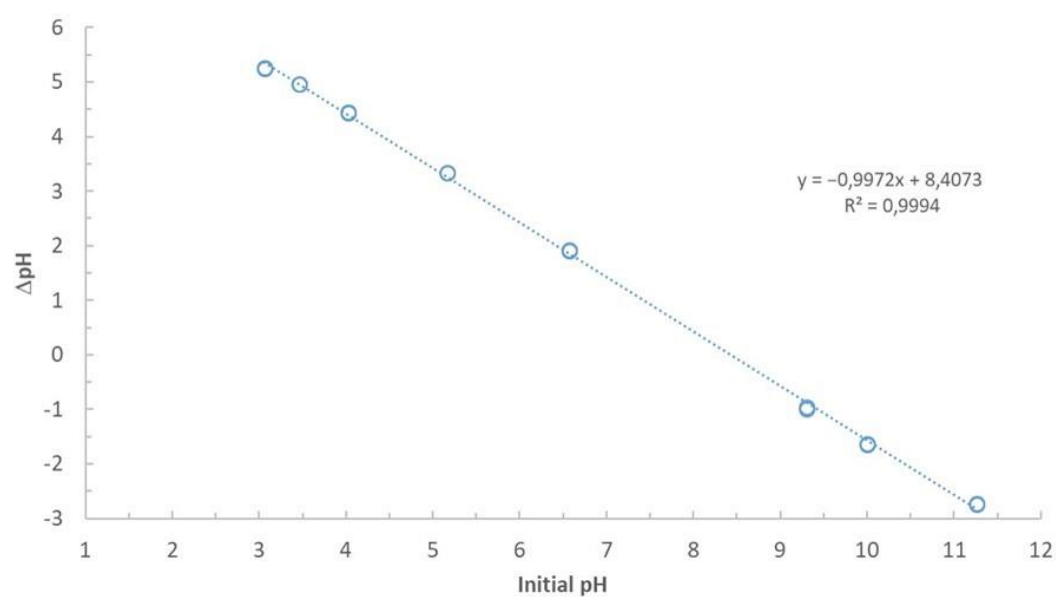

**Figure S3.** Regression fitting for the calculation of  $\text{pH}_{\text{PZC}}$  (FGH).

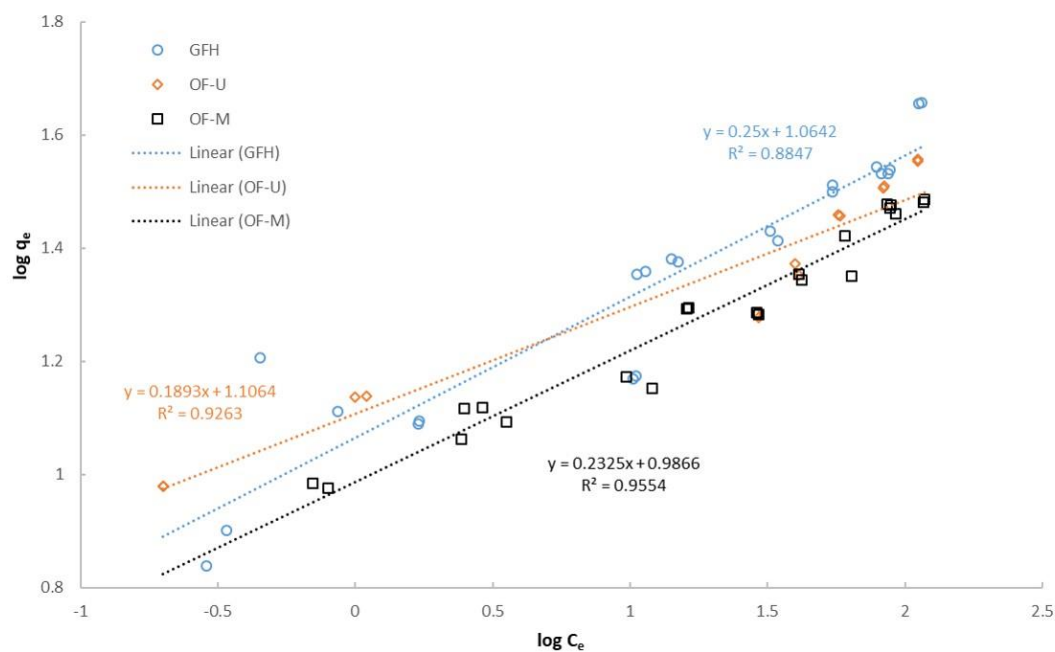

(a)

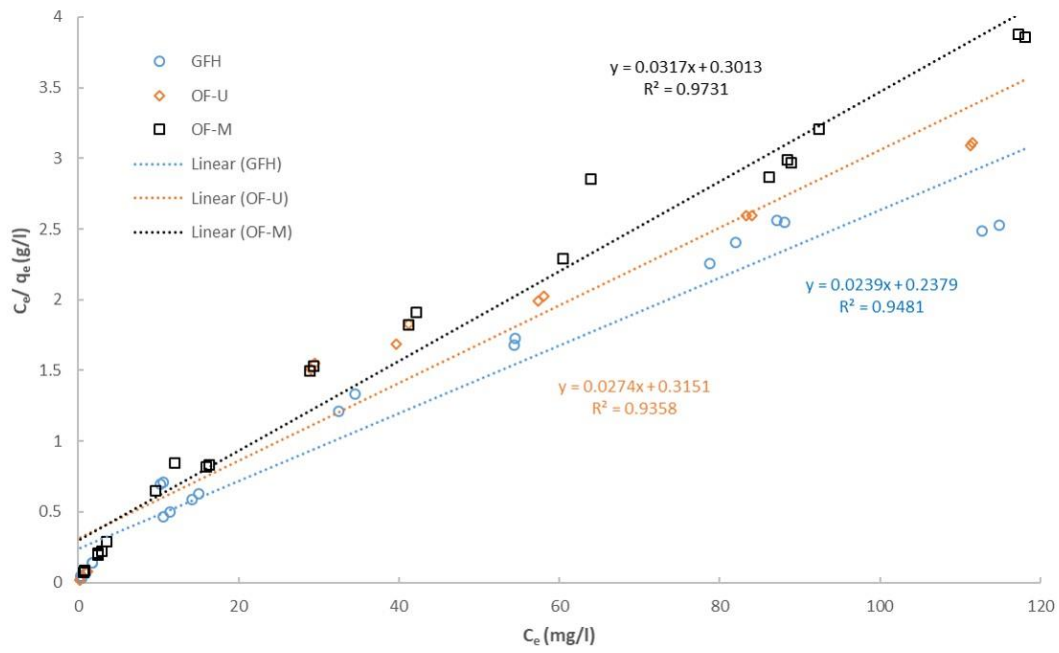

(b)

**Figure S4.** Linear regression fittings for the equilibrium models (a) Freundlich model, (b) Langmuir model.

**Table S1.** 95% significance test for  $b_3$  in Langmuir fitting parameters (a) Comparison GFH ( $D = 0$ ) and OF-M ( $D = 1$ ), (b) Comparison GFH ( $D = 0$ ) and OF-U ( $D = 1$ ).

SUMMARY OUTPUT

GFH vs OF-M

| Regression Statistics |             |
|-----------------------|-------------|
| Multiple R            | 0.982760897 |
| R Square              | 0.965818982 |
| Adjusted R Square     | 0.963255405 |
| Standard Error        | 0.222550143 |
| Observations          | 44          |

ANOVA

|            | df | SS          | MS          | F           | Significance F |
|------------|----|-------------|-------------|-------------|----------------|
| Regression | 3  | 55.9791738  | 18.6597246  | 376.7467161 | 2.39604E-29    |
| Residual   | 40 | 1.981142641 | 0.049528566 |             |                |
| Total      | 43 | 57.96031644 |             |             |                |

|           | Coefficients | Standard Error | t Stat      | P-value     | Lower 95%    | Upper 95%   |
|-----------|--------------|----------------|-------------|-------------|--------------|-------------|
| Intercept | 0.237905653  | 0.065762378    | 3.617655864 | 0.000824554 | 0.104994929  | 0.370816377 |
| Ce        | 0.02392523   | 0.00122661     | 19.50516999 | 4.84956E-22 | 0.021446159  | 0.0264043   |
| D         | 0.063369259  | 0.095530174    | 0.663342861 | 0.510916092 | -0.129704425 | 0.256442943 |
| D-Ce      | 0.007726479  | 0.001717495    | 4.498690812 | 5.75792E-05 | 0.004255292  | 0.011197666 |

Significant difference of slopes ( $q_{max}$ )

(a)

## SUMMARY OUTPUT

GFH vs OF-U

| Regression Statistics |             |
|-----------------------|-------------|
| Multiple R            | 0.972227164 |
| R Square              | 0.945225659 |
| Adjusted R Square     | 0.940090565 |
| Standard Error        | 0.255705097 |
| Observations          | 36          |

## ANOVA

|            | df | SS          | MS          | F           | Significance F |
|------------|----|-------------|-------------|-------------|----------------|
| Regression | 3  | 36.10664124 | 12.03554708 | 184.0717182 | 2.95275E-20    |
| Residual   | 32 | 2.092323092 | 0.065385097 |             |                |
| Total      | 35 | 38.19896433 |             |             |                |

|           | Coefficients | Standard Error | t Stat      | P-value     | Lower 95%    | Upper 95%   |
|-----------|--------------|----------------|-------------|-------------|--------------|-------------|
| Intercept | 0.237905653  | 0.07555949     | 3.148587331 | 0.003541433 | 0.083996008  | 0.391815298 |
| Ce        | 0.02392523   | 0.001409347    | 16.97611199 | 1.4566E-17  | 0.021054484  | 0.026795975 |
| D         | 0.077199973  | 0.131123538    | 0.588757553 | 0.56015728  | -0.189889933 | 0.34428988  |
| D-Ce      | 0.003523407  | 0.002274152    | 1.549327347 | 0.131137603 | -0.00110889  | 0.008155703 |

Not significant difference of slopes ( $q_{\max}$ )

(b)

Table S2. Adsorption of main anions in wastewater.

| Initial conditions |       |           |                 | Anions <sup>1</sup> |                 |
|--------------------|-------|-----------|-----------------|---------------------|-----------------|
| Sample             | t (h) | m/V (g/L) | Chloride (mg/L) | Nitrate (mg/L)      | Sulphate (mg/L) |
| MR-1 <sup>2</sup>  | 0     | 0         | 796.5           | 25.0                | 61.5            |
| MR-1               | 120   | 2         | 798.0           | 25.0                | 99.5            |
| MR-1               | 120   | 3         | 797.5           | 25.0                | 116.0           |
| MR-2 <sup>2</sup>  | 0     | 0         | 392.5           | 101.6               | 320.0           |
| MR-2               | 120   | 2         | 393.0           | 106.7               | 362.0           |
| MR-2               | 120   | 3         | 390.0           | 106.7               | 379.5           |

<sup>1</sup> Average of two values <sup>2</sup> Initial values**Theoretical phosphate removal**

The theoretical determination of the phosphate removal as a function of the initial concentration and adsorbent dosage is shown in Figure S5. The figure was calculated from the equilibrium concentration of the FGHI isotherm using Equations (1), (2), and (4), coded into Microsoft Excel™ spreadsheet.

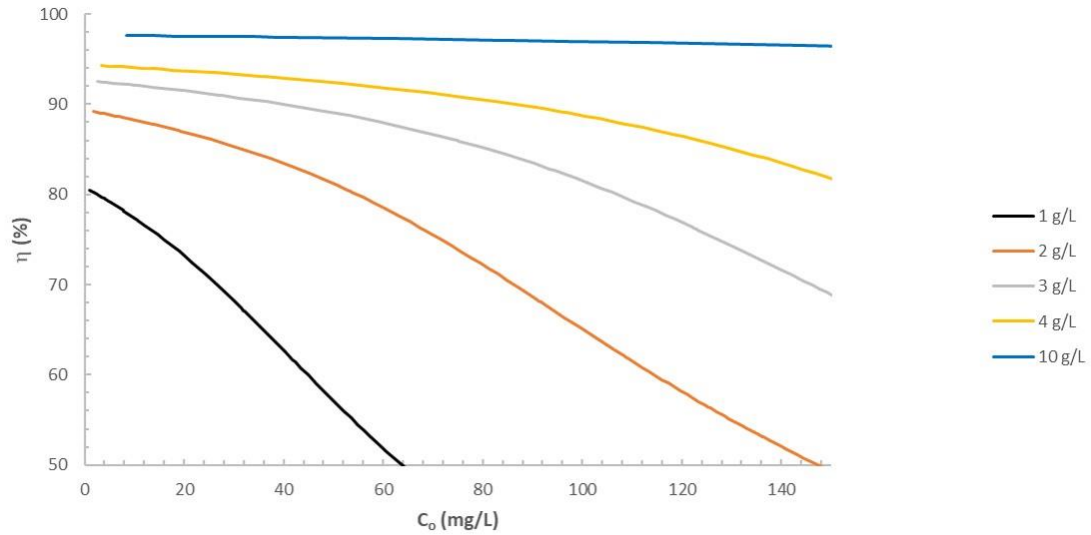

**Figure S5.** Theoretical phosphate removal from Langmuir isotherms (GFH) as a function of initial phosphate concentration and adsorbent concentration (dosage).

These results could be used to optimize the removal and the adsorbent dose for samples with different concentrations of phosphates. For example, with an initial concentration of 40 mg/L of phosphate (similar to MR-2 wastewater), a dosage of 3 g/L would be needed to reach 90% removal. For higher removal values, the dosage would need to be increased which also increases the operational costs, but recovery becomes less sensitive to initial concentration.

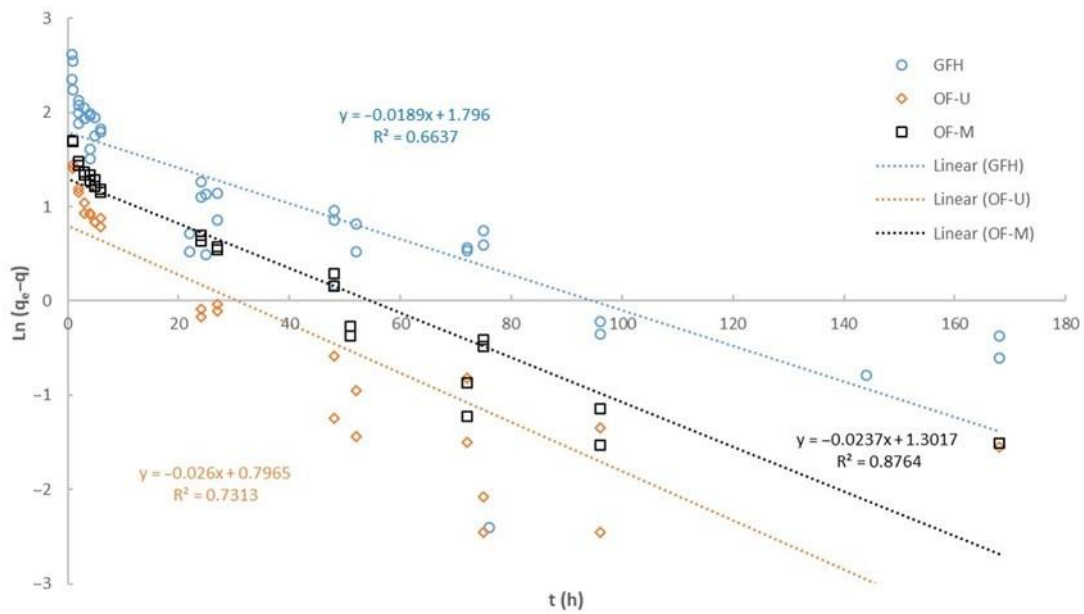

(a)

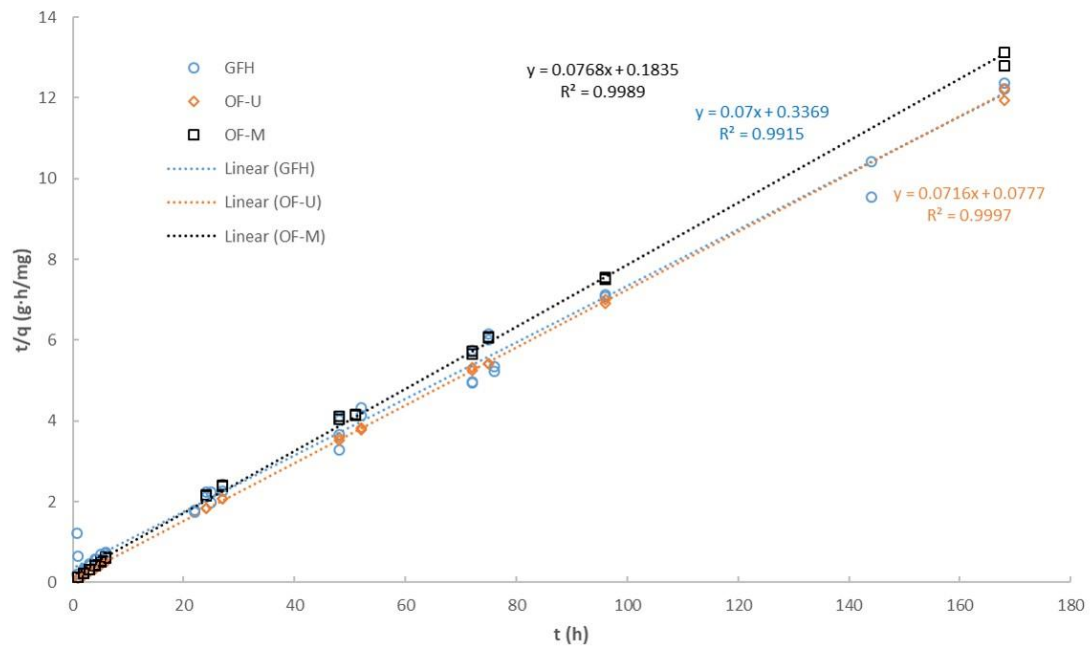

(b)

**Figure S6.** Linear regression fittings for the kinetic models (a) Pseudo first-order model, (b) Pseudo second-order model.

**Table S3.** 95% significance test for  $b_3$  in second-order fitting parameters, (a) Comparison GFH ( $D = 0$ ) and OF-M ( $D = 1$ ), (b) Comparison GFH ( $D = 0$ ) and OF-U ( $D = 1$ ).

SUMMARY OUTPUT

GFH vs OF-M

| Regression Statistics |             |
|-----------------------|-------------|
| Multiple R            | 0.997332872 |
| R Square              | 0.994672857 |
| Adjusted R Square     | 0.994444551 |
| Standard Error        | 0.252318409 |
| Observations          | 74          |

ANOVA

|            | df | SS          | MS          | F           | Significance F |
|------------|----|-------------|-------------|-------------|----------------|
| Regression | 3  | 832.1120654 | 277.3706885 | 4356.750496 | 1.8E-79        |
| Residual   | 70 | 4.456520568 | 0.06366458  |             |                |
| Total      | 73 | 836.568586  |             |             |                |

|           | Coefficients | Standard Error | t Stat      | P-value     | Lower 95%    | Upper 95%   |
|-----------|--------------|----------------|-------------|-------------|--------------|-------------|
| Intercept | 0.336881149  | 0.05072021     | 6.641950969 | 5.57799E-09 | 0.23572288   | 0.438039418 |
| t         | 0.070022607  | 0.0008118      | 86.25599967 | 8.14054E-73 | 0.068403523  | 0.071641691 |
| D         | -0.153362609 | 0.081599868    | -1.87944678 | 0.064346262 | -0.316108415 | 0.009383196 |
| D·t       | 0.00680702   | 0.001306779    | 5.209006572 | 1.82327E-06 | 0.004200732  | 0.009413309 |

Significant difference of slopes (qe)

(a)

## SUMMARY OUTPUT

GFH vs OF-U

| <i>Regression Statistics</i> |             |
|------------------------------|-------------|
| Multiple R                   | 0.997368089 |
| R Square                     | 0.994743106 |
| Adjusted R Square            | 0.99451781  |
| Standard Error               | 0.243664403 |
| Observations                 | 74          |

| ANOVA      |           |             |             |             |                       |
|------------|-----------|-------------|-------------|-------------|-----------------------|
|            | <i>df</i> | <i>SS</i>   | <i>MS</i>   | <i>F</i>    | <i>Significance F</i> |
| Regression | 3         | 786.4369422 | 262.1456474 | 4415.282288 | 1.13112E-79           |
| Residual   | 70        | 4.156063898 | 0.059372341 |             |                       |
| Total      | 73        | 790.5930061 |             |             |                       |

|           | <i>Coefficients</i> | <i>Standard Error</i> | <i>t Stat</i> | <i>P-value</i> | <i>Lower 95%</i> | <i>Upper 95%</i> |
|-----------|---------------------|-----------------------|---------------|----------------|------------------|------------------|
| Intercept | 0.336881149         | 0.048980611           | 6.877847068   | 2.08405E-09    | 0.239192401      | 0.434569897      |
| t         | 0.070022607         | 0.000783957           | 89.31947515   | 7.22929E-74    | 0.068459055      | 0.07158616       |
| D         | -0.25920569         | 0.078831027           | -3.288117616  | 0.00157977     | -0.416429217     | -0.101982163     |
| D:t       | 0.00160459          | 0.001261707           | 1.271761641   | 0.207666917    | -0.000911804     | 0.004120985      |

No significant difference of slopes (qe)

(b)
